# Supplementary material for: Mitigating impacts of low energy laser pulses on CALIOP data products
Source: Copernicus journal article supplement (doi:10.5194/egusphere-2025-2376), 2025-06-23
Supplement: Supplementary file 1 [file egusphere-2025-2376-supplement.pdf]

# **Supplement of Mitigating impacts of low energy laser pulses on CALIOP data products**

Jason L. Tackett et al.

5 *Correspondence to:* Jason L. Tackett (jason.l.tackett@nasa.gov)

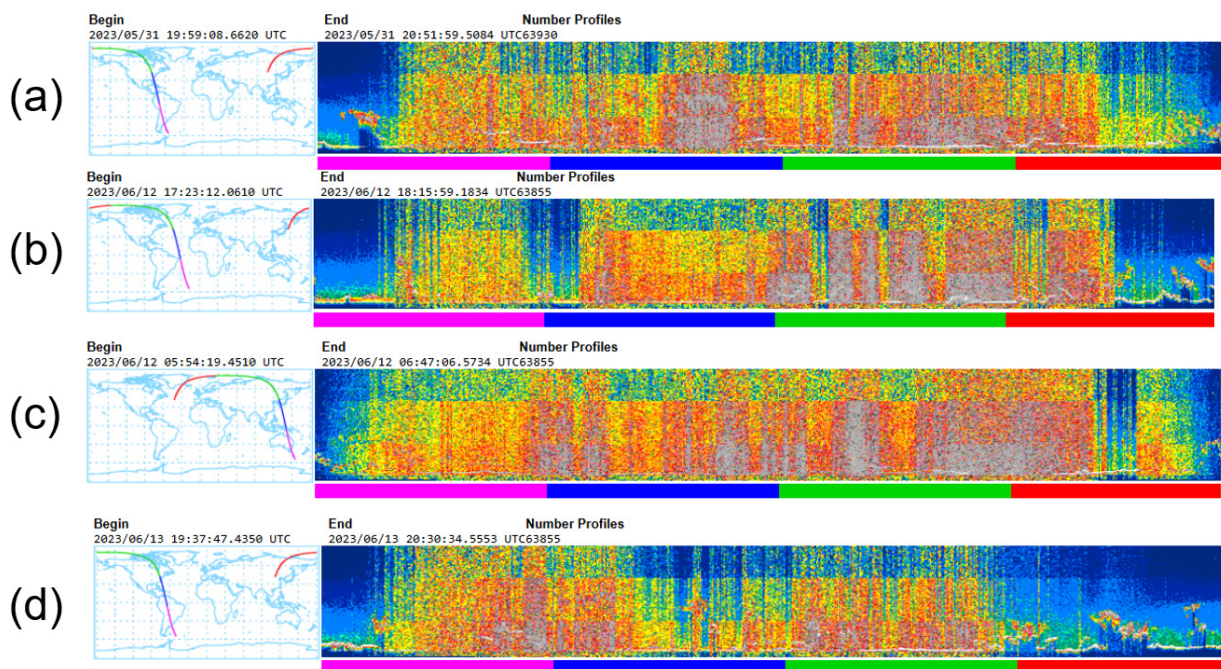

10 **Figure S1.** Examples of half-orbits experiencing low energy shots for nearly their entire duration in early 2023. Orbit ground-tracks are shown on the maps. The right-hand images show 532 nm total attenuated backscatter with altitude on the vertical axis and along-track distance on the horizontal axis. Granules: (a) CAL\_LID\_L1-Standard-V4-51.2023-05-31T19-59-14ZD.hdf, (b) CAL\_LID\_L1-Standard-V4-51.2023-06-12T17-23-15ZD.hdf, (c) CAL\_LID\_L1-Standard-V4-51.2023-06-12T05-54-23ZD.hdf, (d) CAL\_LID\_L1-Standard-V4-51.2023-06-13T19-37-48ZD.hdf.

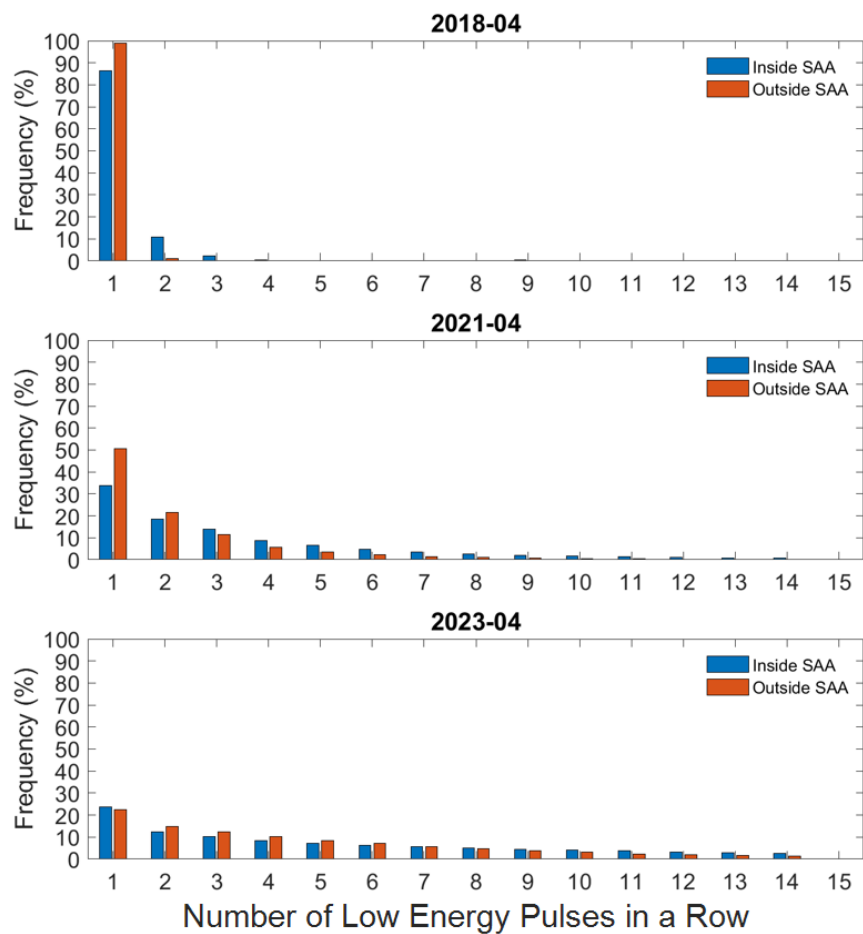

**Figure S2. Frequency of number of low energy laser pulses (532 nm energy < 10 mJ) in a row inside the SAA and outside the SAA for April 2018, April 2021, and April 2023.**

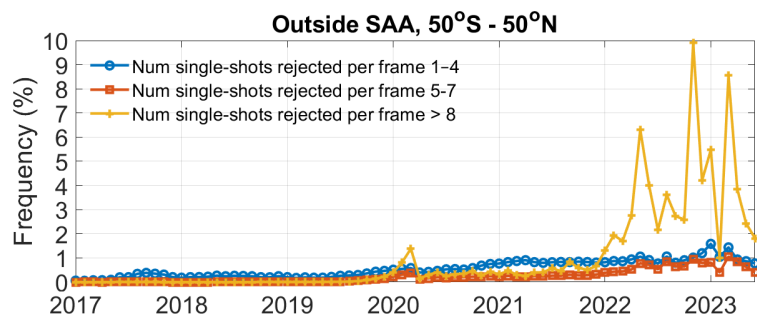

**Figure S3.** Frequency of frames having 1–4 single-shot profiles rejected by LEM (blue), 5–7 single-shot profiles rejected by LEM (red) and > 8 single-shot profiles rejected by LEM outside the SAA, 50°S–50°N for January 2017 through October 2022.

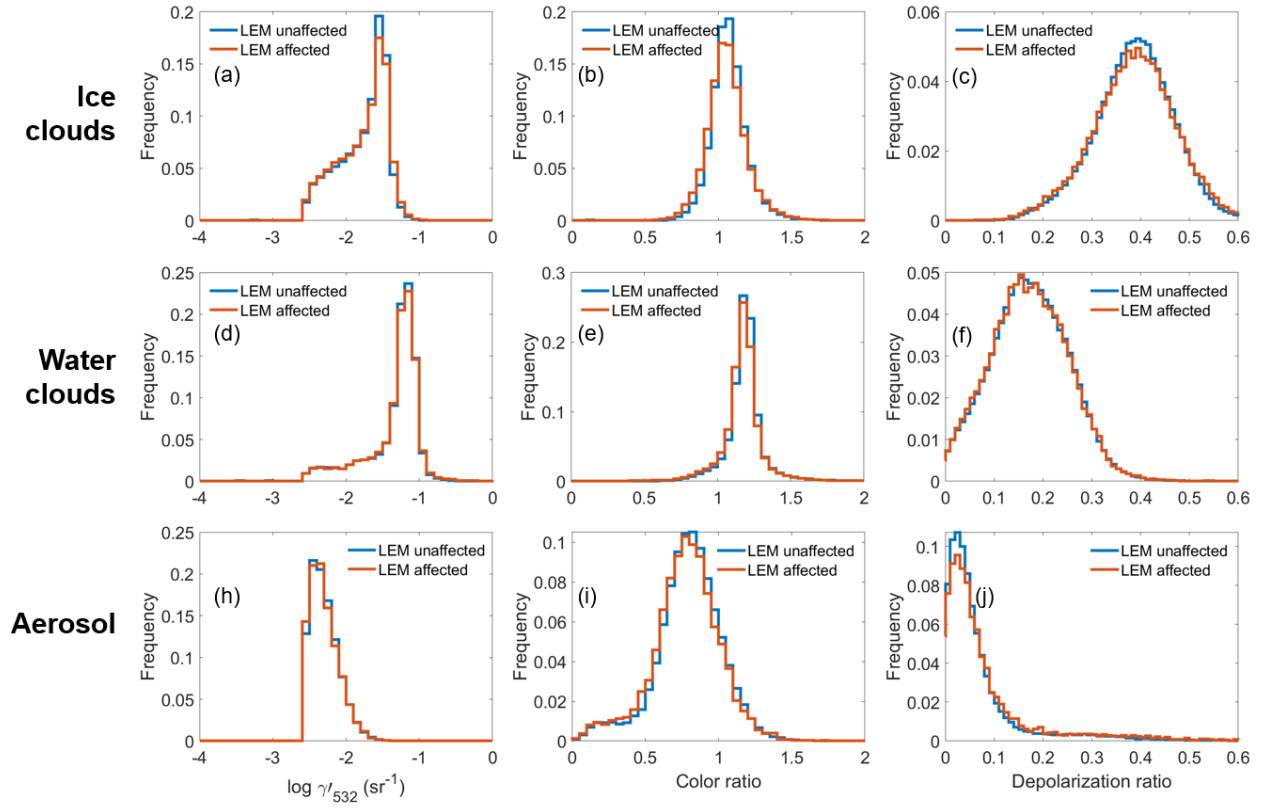

Figure S4. Frequency distributions of layer-integrated 532 nm attenuated backscatter ( $\gamma'_{532}$ ), attenuated backscatter color ratio ( $\chi'$ ), and volume depolarization ratio ( $\delta_v$ ) for ice clouds (a-c), water clouds (d-f), and aerosol layers (h-j) detected at 5 km horizontal resolution between 50°S-50°N, excluding the SAA, during 2021 daytime. LEM-affected layers are identified by LEM feature QC flag = 1.

|                 |            | Median $\pm$ MAD  | Relative<br>difference in<br>median | Relative<br>difference in<br>MAD | Median $\pm$ MAD of all<br>relative differences |
|-----------------|------------|-------------------|-------------------------------------|----------------------------------|-------------------------------------------------|
| $\gamma'_{532}$ | Unaffected | $0.019 \pm 0.010$ | $-3.22 \%$                          | $6.71 \%$                        | $-0.65 \pm 49.0 \%$                             |
|                 | Affected   | $0.019 \pm 0.010$ |                                     |                                  |                                                 |
| $\chi'$         | Unaffected | $1.038 \pm 0.093$ | $-1.16 \%$                          | $12.4 \%$                        | $-1.22 \pm 10.1 \%$                             |
|                 | Affected   | $1.026 \pm 0.105$ |                                     |                                  |                                                 |
| $\delta_v$      | Unaffected | $0.385 \pm 0.065$ | $0.06 \%$                           | $9.87 \%$                        | $-0.004 \pm 15.9 \%$                            |
|                 | Affected   | $0.385 \pm 0.071$ |                                     |                                  |                                                 |
| $\gamma'_{532}$ | Unaffected | $0.053 \pm 0.027$ | $-0.31 \%$                          | $65.1 \%$                        | $0.06 \pm 131 \%$                               |
|                 | Affected   | $0.053 \pm 0.045$ |                                     |                                  |                                                 |
| $\chi'$         | Unaffected | $1.164 \pm 0.116$ | $-1.08 \%$                          | $7.56 \%$                        | $-0.99 \pm 10.3 \%$                             |
|                 | Affected   | $1.152 \pm 0.125$ |                                     |                                  |                                                 |
| $\delta_v$      | Unaffected | $0.166 \pm 0.066$ | $-0.61 \%$                          | $0.43 \%$                        | $-0.58 \pm 35.7 \%$                             |
|                 | Affected   | $0.165 \pm 0.066$ |                                     |                                  |                                                 |
| $\gamma'_{532}$ | Unaffected | $0.004 \pm 0.002$ | $-1.61 \%$                          | $-0.27 \%$                       | $-1.49 \pm 35.0 \%$                             |
|                 | Affected   | $0.004 \pm 0.002$ |                                     |                                  |                                                 |
| $\chi'$         | Unaffected | $0.781 \pm 0.171$ | $-2.65 \%$                          | $4.13 \%$                        | $-2.38 \pm 24.0 \%$                             |
|                 | Affected   | $0.761 \pm 0.178$ |                                     |                                  |                                                 |
| $\delta_v$      | Unaffected | $0.032 \pm 0.055$ | $14.2 \%$                           | $23.5 \%$                        | $6.84 \pm 464 \%$                               |
|                 | Affected   | $0.036 \pm 0.068$ |                                     |                                  |                                                 |

35 **Table S1. Median and median absolute deviation (MAD) of layer-integrated 532 nm attenuated backscatter ( $\gamma'_{532}$ ), attenuated backscatter color ratio ( $\chi'$ ), and volume depolarization ratio ( $\delta_v$ ) for ice clouds water cloud, and aerosol layers detected at 5 km horizontal resolution between 50°S–50°N, excluding the SAA, during 2021 for daytime. LEM-affected layers are identified by LEM feature QC flag = 1. The final two columns give the median  $\pm$  MAD of all the pairs of affected and unaffected layers.**
