# Supplementary material for: Mitigating impacts of low energy laser pulses on CALIOP data products
Source: Copernicus journal article supplement (doi:10.5194/egusphere-2025-2376), 2025-06-23
Supplement: Supplementary file [file egusphere-2025-2376-AC1-supplement.pdf]

*This manuscript presents a well-structured study on the development and implementation of low-energy mitigation (LEM) procedures to address the impacts of low-energy laser pulses on CALIOP observations during the latter years of the CALIPSO mission. The results show that LEM effectively improves data quality, corrects calibration biases, and provides new quality control tools that will greatly enrich CALIOP data products during the final seven years of low-energy operation. I recommend this work for publication in Atmospheric Measurement Techniques (AMT).*

We thank the referee for their review of the manuscript.
